# Supplementary material
Source: publisher site journal article supplement (https://www.dovepress.com/article/263177)
Supplement: Supplementary file 1 [file get_supplementary_file.php]

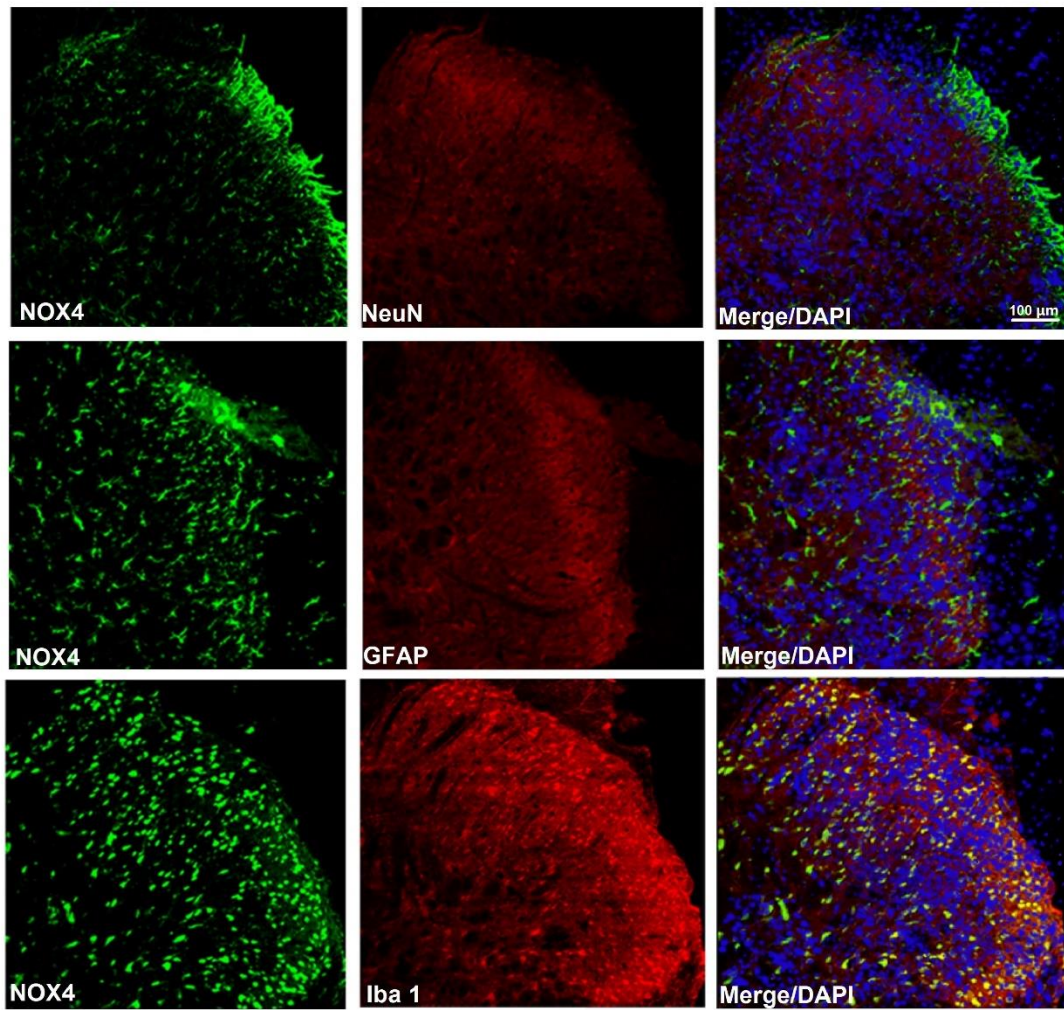

**Supplementary Figure 1. Cellular localization of NOX4 expression in spinal cord dorsal horn of rats in CIBP group (bar=100μm).**

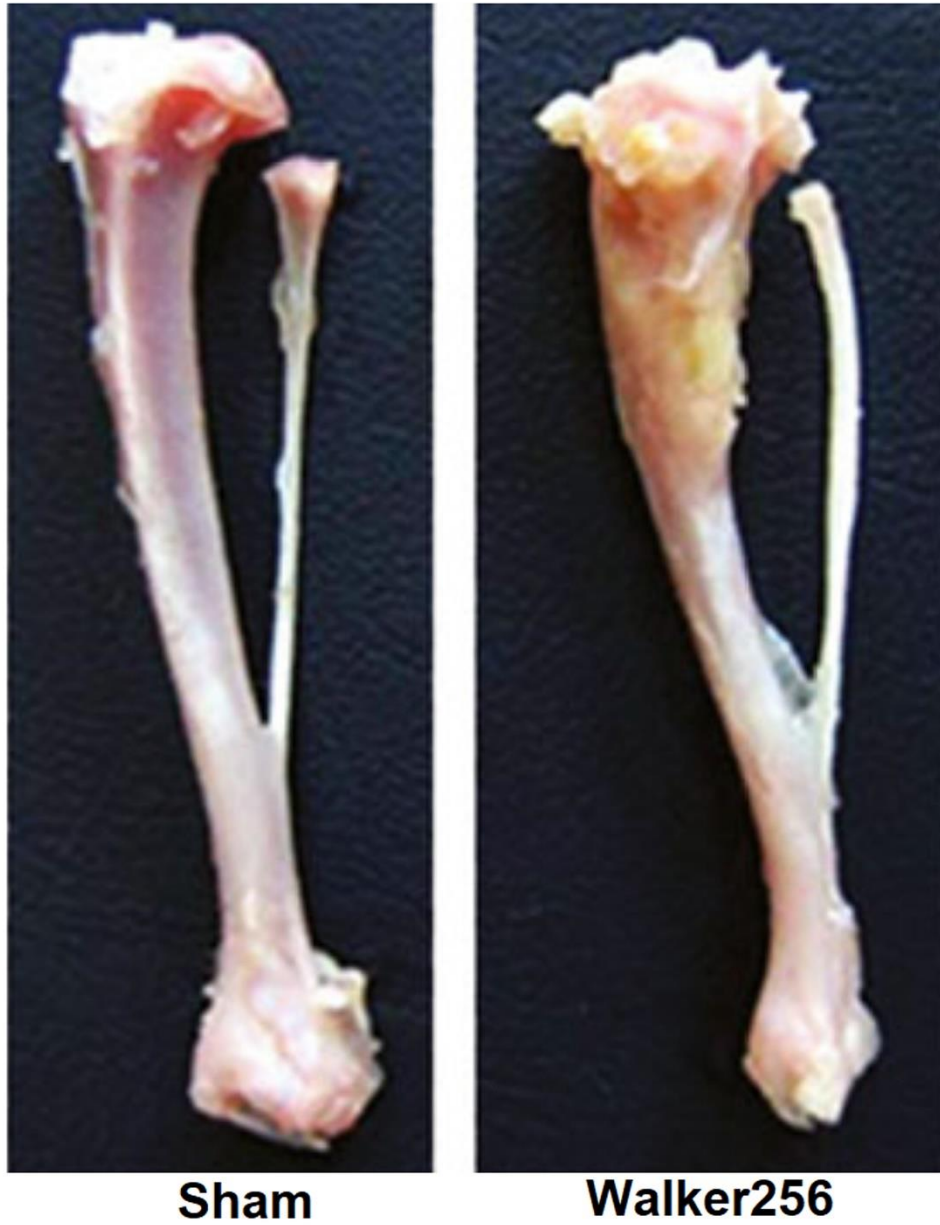

**Supplementary Figure 2. Tibia bone from normal and tumor bearing rats 14 days after Walker 256 inoculation.**

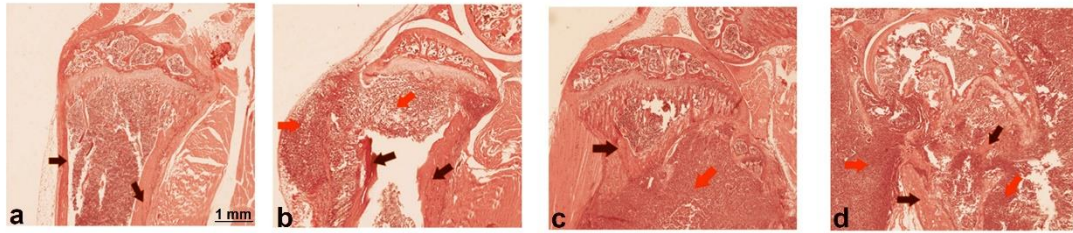

**Supplementary Figure 3. H&E staining micrographs of metaphyseal bone in the tibiae.**

a-d showing the sham-operated and tumor-bearing rats on days 7, 14 and 21 after tumor inoculation; black arrow showing trabecular bone, red arrow showing cancer nest.
